# Supplementary material for: Dissolution from inside: a unique degradation behaviour of core–shell magnetic mesoporous silica nanoparticles and the effect of polyethyleneimine coating
Source: Royal Society of Chemistry journal article supplement (doi:10.1039/c2jm34364a), 2012-01-01
Supplement: c2jm34364a.pdf [file c2jm34364a.pdf]

## Supporting Information

### 1. Experimental

We adopted two methods to produce two types of pristine mesoporous silica nanoparticles without magnetic Fe<sub>3</sub>O<sub>4</sub> cores (MSN).

#### 1.1 Synthesis of MSN-h

- 5 5 mg synthesized magnetic mesoporous silica nanoparticles (M-MSNs) were dispersed in 20 mL ethanol and then 120 μL concentrated hydrochloric acid was added. The mixture was heated and refluxed at 60 °C overnight. Then it was centrifuged and washed with ethanol three times and the product was denoted as MSN-h.

#### 1.2 Synthesis of MSN

- 10 MSN was synthesized under the same condition as M-MSN without adding oleic acid stabilized Fe<sub>3</sub>O<sub>4</sub> nanoparticles. Briefly, 10 mL aqueous solution containing 0.15 g CTAB was added to a solution of 45 mL water and 2 mL NaOH (2 M), followed by heating at 70 °C for 10 min under stirring. Afterward, 0.5 mL TEOS and 2 mL ethyl acetate was introduced dropwise to the reaction solution under 70 °C for 3 h and the resultant products were collected by centrifugation and washed repeatedly with ethanol and water to remove any non-reacted reagents. Finally, the template removal was performed by a highly efficient ion-exchange method. The as-prepared sample was denoted as MSNs.

## 15 2. Results

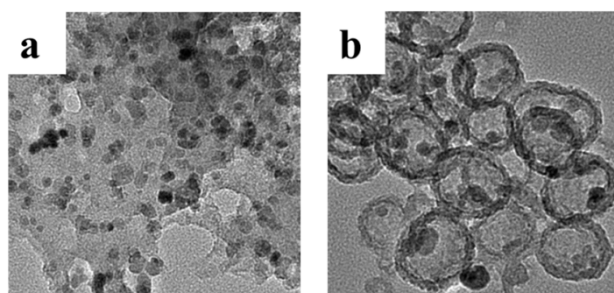

**Fig. S1** TEM images of M-MSNs and M-MSN@PEI immersed in PBS (0.1 mg mL<sup>-1</sup>) for 50 h at 37 °C.

**Table S1** the Dynamic Light Scattering (DLS) characterization for M-MSN and M-MSN@PEI

| Particles      | Hydrodynamic size<br>(nm) | Polydispersity<br>Index | Zeta potential<br>(mv) |
|----------------|---------------------------|-------------------------|------------------------|
| M-MSNs         | 100.4                     | 0.053                   | -29.75 ± 0.25          |
| M-MSN@PEI      | 132.5                     | 0.058                   | 46.95 ± 0.35           |
| M-MSN@PEI-50 h | -                         | -                       | 34.55 ± 0.30           |

Note: M-MSN@PEI-50 h refers to the sample of M-MSN@PEI after immersing 50 h in PBS
